# Supplementary material
Source: HighWire-hosted journal article supplement (https://www.annals.org/content/suppl/2007/02/01/146.3.193)
Supplement: Turgeon_T1_146-3-193-DC1-1.pdf [file Turgeon_T1_146-3-193-DC1-1.pdf]

**Table 1. Baseline Characteristics of Patients, Minimal Inclusion Criteria, and Intravenous Immunoglobulin Regimen\***

| Author, Year (Reference)                             | Patients, n | Mean Age (SD), y |               | Inclusion Criteria                                                                         | Reported Severity of Illness Measures                           |                                                                 | Treatment Regimens                                                                                                                            | Total Dose, g/kg of body weight | Duration of Therapy, d |
|------------------------------------------------------|-------------|------------------|---------------|--------------------------------------------------------------------------------------------|-----------------------------------------------------------------|-----------------------------------------------------------------|-----------------------------------------------------------------------------------------------------------------------------------------------|---------------------------------|------------------------|
|                                                      |             | IVIG Group       | Control Group |                                                                                            | IVIG Group                                                      | Control Group                                                   |                                                                                                                                               |                                 |                        |
|                                                      |             |                  |               |                                                                                            |                                                                 |                                                                 |                                                                                                                                               |                                 |                        |
| Lindquist et al., 1981 (17)                          | 67          | 48.3             | 39.2          | Sepsis secondary to septicemia (Svanbom criteria) (reference 37)                           | NR                                                              | NR                                                              | Gamma-Venin (ZLB Behring, King of Prussia, Pennsylvania) (days 0–2, 0.15 g/kg; then every wk as needed) vs. no intervention                   | 0.45                            | 3 (+ as needed)        |
| Just et al., 1986 (18)                               | 104         | 40.2 (18.5)      | 40.2 (18.6)   | Sepsis mainly after surgery or trauma (Center for Disease Control criteria) (reference 38) | NR                                                              | NR                                                              | Firma (Biotest Pharma, Frankfurt, Germany) (5 g every 12 h for 4 doses) vs. no intervention                                                   | 0.30†                           | 2                      |
| Jesdinsky et al., 1987 (19)                          | 288         | 53.8 (17.5)      | 55.1 (19.0)   | Sepsis from abdominal infections                                                           | NR                                                              | NR                                                              | Immunoglobulin 7S (Armour Pharma, Eschwege, Germany) (day 0, 10/g; days 1 to 4, 20.5 g) vs. no intervention                                   | 1.35†                           | 5                      |
| Spannbrucker, 1987 (20), and Vogel et al., 1988 (21) | 50          | 50.8 (15.5)      | 54.5 (12.0)   | Septic shock                                                                               | NR                                                              | NR                                                              | Pentaglobin (Biotest Pharma, Germany) (days 0 to 2, 0.15 g/kg) vs. no intervention                                                            | 0.45                            | 3                      |
| De Simone et al., 1988 (22)                          | 24          | 45 (4)           | 34 (5)        | Severe sepsis                                                                              | NR                                                              | NR                                                              | Sandoglobulin (Sandoz Pharmaceutical, Milan, Italy) (day 1, 0.4 g/kg; day 2, 0.2 g/kg; day 7, 0.4 g/kg [as needed]) vs. no intervention       | 0.60                            | 2 (+ as needed)        |
| Grundmann and Hornung, 1988 (23)                     | 46          | 46.9             | 52.8          | Sepsis from gram-negative bacteriemia with positive endotoxin (sepsis score $\geq 12$ )    | Mean sepsis score 17.0 (SD, 4.0)                                | Mean sepsis score 18.9 (SD, 4.8)                                | Intraglobin F (Biotest Pharma, Frankfurt, Germany) days 0 and 1, 0.25 g/kg, vs. no intervention                                               | 0.50                            | 2                      |
| Wesoly et al., 1990 (24)                             | 35          | 44.7 (19)        | 54.8 (17)     | Sepsis after surgery (sepsis score $\geq 12$ )                                             | Mean sepsis score 14.8 (SD, 2.5)                                | Mean sepsis score 16.3 (SD, 3.6)                                | Pentaglobin (Biotest Pharma, Germany) (days 0–2, 0.25 g/kg) vs. no intervention                                                               | 0.75                            | 3                      |
| Burns et al., 1991 (25)                              | 38          | 61.5             | 59.8          | Sepsis and thrombocytopenia                                                                | NR                                                              | NR                                                              | Sandoglobulin (Sandoz Pharmaceutical, Milan, Italy) (days 0–2, 0.4 g/kg) vs. albumin                                                          | 1.2                             | 3                      |
| Dominioni et al., 1991 (26)‡                         | 62          | 67 (10)          | 68 (12)       | Severe sepsis after surgery or trauma (sepsis score $\geq 20$ )                            | Mean sepsis score, 24 (SD, 4); mean APACHE II score, 17 (SD, 5) | Mean sepsis score, 24 (SD, 3); mean APACHE II score, 18 (SD, 5) | Sandoglobulin (Sandoz Pharmaceutical, Basel, Switzerland) (days 0 and 1, 0.4 g/kg, day 5; 0.2 g/kg) vs. human albumin in 5% dextrose in water | 1                               | 2 + 1§                 |

*Continued on following page*

Table 1—Continued

| Author, Year (Reference)      | Patients, n | Mean Age (SD), y |               | Inclusion Criteria                                                                                     | Reported Severity of Illness Measures                                                               |                                                                                                     | Treatment Regimens                                                                                                                                                | Total Dose, g/kg of body weight | Duration of Therapy, d |
|-------------------------------|-------------|------------------|---------------|--------------------------------------------------------------------------------------------------------|-----------------------------------------------------------------------------------------------------|-----------------------------------------------------------------------------------------------------|-------------------------------------------------------------------------------------------------------------------------------------------------------------------|---------------------------------|------------------------|
|                               |             | IVIIG Group      | Control Group |                                                                                                        | IVIIG Group                                                                                         | Control Group                                                                                       |                                                                                                                                                                   |                                 |                        |
| Schedel et al., 1991 (27)‡    | 69          | 46 (16)          | 37 (18)       | Severe sepsis                                                                                          | APACHE II score, 30; unsure whether mean or median                                                  | APACHE II score, 24; unsure whether mean or median                                                  | Pentaglobin (Biotest Pharma, Dreieich, Germany) (day 0, 30 g; days 1 and 2, 15 g) vs. no intervention                                                             | 0.85†                           | 3                      |
| Behre et al., 1995 (28)‡      | 52          | 50               | 55§           | Severe sepsis with hematologic malignant condition and neutropenia (ACCP/SCCM criteria) (reference 13) | NR                                                                                                  | NR                                                                                                  | Pentaglobin (Biotest Pharma Dreieich, Germany) (time 0, 10 g; then 5 g every 6 h for 72 h) vs. 5% human albumin                                                   | 0.9†                            | 3                      |
| Dominioni et al., 1996 (29)‡¶ | 55          | 55 (19)          | 57 (19)       | Severe sepsis after surgery or trauma (sepsis score $\geq 16$ )                                        | Mean sepsis score, 23 (SD, 4)                                                                       | Mean sepsis score, 23 (SD, 4)                                                                       | Sandoglobulin (Sandoz Pharmaceutical, Basel, Switzerland) (days 0 and 1, 0.4 g/kg; day 5, 0.2 g/kg) vs. human albumin in 5% dextrose in water and saline solution | 1                               | 2 + 1§                 |
| Werdan et al., 1997 (10)‡     | 652         | NR               | NR            | APACHE II score of 20–35; sepsis, severe sepsis, or septic shock (sepsis score $\geq 12$ )             | NR; inclusion criteria indicate a range of APACHE II scores of 20–35¶**                             | NR; inclusion criteria indicate a range of APACHE II scores of 20–35¶**                             | Polyglobin N (Bayer, Germany) (day 0, 0.6 g/kg; day 1, 0.3 g/kg) vs. 0.1% albumin in 10% maltose                                                                  | 0.9**                           | 2**                    |
| Yakut et al., 1998 (30)       | 40          | 32 (16)          | 31 (16)       | Severe sepsis postsurgery (sepsis score $\geq 16$ )                                                    | Mean sepsis score, 20 (SD, 4); mean APACHE II score, 16 (SD, 4)                                     | Mean sepsis score, 20 (SD, 3); mean APACHE II score, 16 (SD, 5)                                     | Gamumin N (Miles Inc., Pharmaceutical Division, Ekhart, Indiana) (days 0 and 1, 0.4 g/kg; days 2–4, 0.2 g/kg) vs. human albumin                                   | 1.4                             | 5                      |
| Masaoka et al., 2000 (31)‡    | 682         | <65 ††           | <65 ††        | Sepsis mainly with neutropenia after chemotherapy                                                      | NR                                                                                                  | NR                                                                                                  | IVIIG nonspecified (days 3–5, 5 g) vs. no intervention                                                                                                            | 0.2†                            | 3                      |
| Tugrul et al., 2002 (32)      | 42          | 42.0 (18)        | 49.3 (20.6)   | Severe sepsis (ACCP/SCCM criteria) (reference 13)                                                      | Mean APACHE II score, 10.5 (SD, 4.6); mean SOFA score 5.0 (SD, 2.7); mean GCS score, 14.2 (SD, 2.1) | Mean APACHE II score, 14.0 (SD, 8.5); mean SOFA score, 5.7 (SD, 4.0); mean GCS score 12.9 (SD, 4.0) | Pentaglobin (Biotest Pharma, Dreieich, Germany) (days 0–2, 0.25 g/kg) vs. standard sepsis therapy                                                                 | 0.75                            | 3                      |
| Karatzas et al., 2002 (33)    | 82          | 50.5 (3.3)       | 50.7 (7.4)    | Severe sepsis (ACCP/SCCM criteria) (reference 13)                                                      | Mean APACHE II score, 21.3 (SD, 7.2)                                                                | Mean APACHE II score, 23.5 (SD, 7.9)                                                                | Pentaglobin (Biotest Pharma, Dreieich, Germany) (days 0–2, 0.25 g/kg) vs. standard sepsis therapy                                                                 | 0.75                            | 3                      |

Table 1—Continued

| Author, Year<br>(Reference)           | Patients,<br><i>n</i> | Mean Age (SD), y |               | Inclusion<br>Criteria                                                                                                                             | Reported Severity of Illness<br>Measures                                                           |                                                                                                    | Treatment Regimens                                                                                                                                | Total Dose,<br><i>g/kg of<br/>body<br/>weight</i> | Duration of<br>Therapy, <i>d</i> |
|---------------------------------------|-----------------------|------------------|---------------|---------------------------------------------------------------------------------------------------------------------------------------------------|----------------------------------------------------------------------------------------------------|----------------------------------------------------------------------------------------------------|---------------------------------------------------------------------------------------------------------------------------------------------------|---------------------------------------------------|----------------------------------|
|                                       |                       | IVIg Group       | Control Group |                                                                                                                                                   | IVIg Group                                                                                         | Control<br>Group                                                                                   |                                                                                                                                                   |                                                   |                                  |
| Darenberg<br>et al.,<br>2003<br>(34)‡ | 21                    | 53 (NR)          | 51 (NR)       | Septic shock<br>from group A<br>streptococci<br>(ACCP/SCCM<br>criteria)<br>(reference 13)                                                         | SAPS II<br>score, 53;<br>SOFA<br>score, 11                                                         | SAPS II<br>score, 51;<br>SOFA<br>score, 11                                                         | Endoglobulin<br>(Baxter) (day 0, 1<br><i>g/kg</i> ; days 1 and<br>2, 0.5 <i>g/kg</i> ) vs.<br>1% albumin                                          | 2                                                 | 3                                |
| Rodríguez et<br>al., 2005<br>(35)‡    | 56                    | 61.3 (19.9)      | 65.9 (18.2)   | Sepsis from<br>abdominal<br>infections<br>(ACCP/SCCM<br>criteria)<br>(reference 13)                                                               | Mean<br>APACHE II<br>score, 16.1<br>(SD, 5.9);<br>mean TISS<br>score, 19.0<br>(SD, 6.5)<br>(day 1) | Mean<br>APACHE II<br>score, 15.2<br>(SD, 6.1);<br>mean TISS<br>score, 21.3<br>(SD, 9.3)<br>(day 1) | Pentaglobin (Biotest<br>Pharma,<br>Frankfurt,<br>Germany) (days<br>0–4, 0.35 <i>g/kg</i> )<br>vs. 5% human<br>albumin                             | 1.75                                              | 5                                |
| Hentrich et<br>al., 2006<br>(36)†     | 206                   | 48.8             | 51.0          | Severe sepsis or<br>septic shock<br>(ACCP/SCCM<br>criteria)<br>(reference 13)<br>with<br>hematologic<br>malignant<br>condition and<br>neutropenia | NR                                                                                                 | NR                                                                                                 | Pentaglobin (Biotest<br>Pharma, Dreieich,<br>Germany) (time 0,<br>10 <i>g</i> ; then 5 <i>g</i><br>every 6 h for 72<br>h) vs. 5% human<br>albumin | 0.9†                                              | 3                                |

\* All sepsis scores refer to reference 39. ACCP/SCCM = American College of Chest Physicians/Society of Critical Care Medicine; APACHE II = Acute Physiology and Chronic Health Evaluation II; GCS = Glasgow Coma Scale; IVIg = intravenous immunoglobulin; NR = not reported; SAPS II = Simplified Acute Physiologic Score II; SOFA = Sepsis-related Organ Failure Assessment; TISS = Therapeutic Intervention Scoring System.

† Based on a patient who weighs 70 kg.

‡ Multicenter trial.

§ Median age.

|| The added number represents an additional day of therapy after the first uninterrupted course.

¶ Patients from a previous study (*n* = 62) (26) were removed from the total sample size (*n* = 117). Raw data for age could not be extracted; mean age is representative of all 117 patients and includes patients from the previous study.

\*\* Based on a protocol published before the study was performed (40).

†† Data are presented as age categories (80% of patients were in each age category).
