# Supplementary material
Source: HighWire-hosted journal article supplement (https://www.annals.org/content/suppl/2007/02/01/146.3.193)
Supplement: Turgeon_T2_146-3-193-DC1-2.pdf [file Turgeon_T2_146-3-193-DC1-2.pdf]

**Table 2. Characteristics of the Methodological Quality of Included Trials\***

| Author, Year (Reference)                                    | Type of Publication       | Jadad Score† | Randomization | Blinding | Attrition Information | Follow-up Period   | Industry-Funded | Intention-to-Treat | Patients Analyzed, % |
|-------------------------------------------------------------|---------------------------|--------------|---------------|----------|-----------------------|--------------------|-----------------|--------------------|----------------------|
| Lindquist et al., 1981 (17)                                 | Article                   | 3            | 2             | 0        | 1                     | NR                 | Yes             | NR                 | 92                   |
| Just et al., 1986 (18)                                      | Article                   | 1            | 1             | 0        | 0                     | ICU discharge      | NR              | NR                 | NR                   |
| Jesdinsky et al., 1987 (19)                                 | Article                   | 2            | 1             | 0        | 1                     | NA                 | Yes             | Yes                | 100                  |
| Spannbrucker, 1987 (20) et al., and Vogel et al., (21) 1988 | Abstract and book chapter | 1            | 1             | 0        | 0                     | NA                 | NR              | Yes                | NR                   |
| De Simone et al., 1988 (22)                                 | Article                   | 1            | 1             | 0        | 0                     | 9 d                | NR              | Yes                | 100                  |
| Grundmann and Hornung, 1988 (23)                            | Article                   | 2            | 1             | 0        | 1                     | ICU discharge      | NR              | Yes                | 100                  |
| Wesoly et al., 1990 (24)                                    | Article                   | 1            | 1             | 0        | 0                     | ICU discharge      | NR              | Yes                | 100                  |
| Burns et al., 1991 (25)                                     | Article                   | 5            | 2             | 2        | 1                     | 9 d                | Yes             | Yes                | 100                  |
| Dominioni et al., 1991 (26)                                 | Article                   | 3            | 1             | 1        | 1                     | 28 d               | Yes             | Yes                | 100                  |
| Schedel et al., 1991 (27)                                   | Article                   | 3            | 2             | 0        | 1                     | 6 wk               | Yes             | NR                 | 80                   |
| Behre et al., 1995 (28)                                     | Article                   | 1            | 1             | 0        | 0                     | 28 d               | NR              | NR                 | 100                  |
| Dominioni et al., 1996 (29)                                 | Article                   | 3            | 1             | 1        | 1                     | Hospital discharge | NR              | Yes                | 100                  |
| Werdan et al., 1997 (10)                                    | Abstract                  | 5‡           | 2‡            | 2‡       | 1‡                    | 28 d‡              | Yes‡            | Yes‡               | 95                   |
| Yakut et al., 1998 (30)                                     | Article                   | 3            | 1             | 1        | 1                     | NR                 | NR              | Yes                | 100                  |
| Masaoka et al., 2000 (31)                                   | Article                   | 3            | 2             | 0        | 1                     | 7 d                | NR              | Yes                | 95                   |
| Tugrul et al., 2002 (32)                                    | Article                   | 3            | 2             | 0        | 1                     | 28 d               | NR              | Yes                | 100                  |
| Karatzas et al., 2002 (33)                                  | Letter                    | 2            | 2             | 0        | 0                     | 28 d               | NR              | Yes                | NR                   |
| Darenberg et al., 2003 (34)                                 | Article                   | 5            | 2             | 2        | 1                     | 28 d               | Yes             | Yes                | 100                  |
| Rodríguez et al., 2005 (35)                                 | Article                   | 5            | 2             | 2        | 1                     | ICU discharge      | Yes             | Yes                | 100                  |
| Hentrich et al., 2006 (36)                                  | Article                   | 3            | 2             | 0        | 1                     | 28 d               | Yes             | Yes                | 98                   |

\* ICU = intensive care unit; NA = not available; NR = not reported.

† Based on randomization (0–2 points), blinding (0–2 points), and presence or absence of attrition information (0–1 point) (16).

‡ Based on a protocol published before the study was performed (40).
